# Supplementary material for: Complexity of synthetic reactions. The use of complexity indices to evaluate reactions, transforms and disconnections1Electronic supplementary information (ESI) available: a Prolegomenon to chemical graph theory; Table 13 and Figure 1, summarizing all possible disconnections of azacyclohexane 28. See http://www.rsc.org/suppdata/nj/b2/b210843g/
Source: Royal Society of Chemistry journal article supplement (doi:10.1039/b210843g), 2003-04-15
Supplement: b210843g.pdf [file b210843g.pdf]

# Complexity of Synthetic Reactions. The Use of Complexity Indices to Evaluate Reactions, Transforms and Disconnections. (Supplementary Information)

Steven H. Bertz

Complexity Study Center, Mendham, NJ 07945 USA

This submission was created using the RSC Article Template

## Prolegomenon

A graph  $G$  consists of a finite set  $V(G)$  of points (or vertices) together with a finite set  $E(G)$  of lines (or edges), which are unordered pairs of distinct points of  $V(G)$ . When the lines of a graph are arcs (or directed lines), which are ordered pairs of distinct points, it is a directed graph or digraph. The null graph  $G_0$  has the null set  $\phi$  for  $V(G)$  and  $E(G)$ . A line  $x = uv = vu$  in  $G$  joins points  $u$  and  $v$ , which are adjacent points. Point  $u$  and line  $x$  are incident to each other. The degree  $d$  of a point is the number of lines incident to it. Two lines that share a point are adjacent lines, e.g.,  $uv$  and  $vw$ . In a multigraph more than one line, i.e., a multiple line, joins at least one pair of points. A loop  $x = uu$  is a line that joins a point to itself. A pseudograph allows both multiple lines and loops. The union  $G_1 \cup G_2$  of graphs  $G_1$  and  $G_2$  has  $V = V_1 \cup V_2$  and  $E = E_1 \cup E_2$ . Disjoint graphs  $G_1$  and  $G_2$  have no points (and hence no lines) in common, i.e.,  $V_1 \cap V_2 = \phi$  and  $E_1 \cap E_2 = \phi$ .

A path  $P_n$  is a sequence of points  $p_1, p_2, p_3, \dots, p_n$  that are joined by lines  $l_1l_2, l_2l_3, \dots, l_{n-1}l_n$ . In a proper (or self-avoiding) path each point is distinct. (Hence each line is also distinct.) Line-disjoint paths can share points, but not lines. In a connected graph (or 1-component graph) all pairs of points are the endpoints of some path. The length of the longest proper path is the diameter  $D$  of the graph. A cycle (or ring)  $C_n$  is a sequence of points  $p_1, p_2, p_3, \dots, p_n$  such that the first one  $p_1$  and last one  $p_n$  are joined by line  $p_1p_n$ , and all  $n$  points are distinct. A tree is a connected graph without cycles (including loops and multiple lines).

The  $n$  points in a labeled graph are distinguished from each other by unique labels  $\lambda_1, \lambda_2, \dots, \lambda_n$ . Alternatively, more than one point can have the same label. To avoid confusion these non-unique labels are called colors, and to assign them is to color the points. A coloring of a graph assigns colors to its points in such a way that no two adjacent points have the same color. A point-labeled graph has at least one labeled (e.g., colored) point that is different from the rest, and analogously for line-labeled graph. A bipartite graph or bigraph is a graph that has a 2-coloring, i.e., every line joins a point of the first color to a point of the second. All trees are bigraphs, including star graphs (or simply stars)  $K_{1,n-1}$  on  $n$  points, where one point of the first color is joined to  $n-1$  points of the second.

Two graphs  $G$  and  $H$  are isomorphic,  $G \cong H$ , if and only if there exists a one-to-one correspondence between their point sets that preserves adjacency. Thus, it does not matter when a graph is relabeled, redrawn or manipulated in any way that leaves the adjacency relation intact; the result is the same graph. An invariant of graph  $G$  is a number  $I(G)$  associated with  $G$  that has the same value for any graph  $H$  isomorphic to  $G$ ; thus,  $I(G) = I(H)$  whenever  $G \cong H$ . Examples of invariants are the number of points  $n$ , the number of lines  $e$  and the number of pairs of adjacent lines (connections)  $\eta$ . A topological index is a real number that is a graph invariant or is derived from one or more invariants.

Two graphs  $X$  and  $Y$  are homeomorphic if and only if they can be derived from a third graph  $Z$  by the subdivision of lines. A line  $x = uv$  is subdivided by replacing it with two lines  $uw$  and  $wv$  that are adjacent at a new point  $w$ , which has  $d = 2$ . An

equivalent definition is based on excision of a point  $w$  of degree 2 and replacement of lines  $uw$  and  $wv$  with a single line  $uv$ . A graph is planar if and only if it has no subgraph homeomorphic to  $K_5$  or  $K_{3,3}$ .

A subgraph  $S_\lambda(G)$  of graph  $G$  is a graph that has all its points in  $V(G)$  and lines in  $E(G)$ . Based on this definition, we include  $G$  itself in the set of all possible subgraphs. A spanning subgraph of  $G$  is a subgraph containing all the points of  $G$ . A spanning subgraph that is also a tree is a spanning tree. For any subset  $S$  of  $V(G)$ , the subgraph of  $G$  induced by  $S$  (or induced subgraph  $\langle S \rangle$ ) is the maximal subgraph of  $G$  with point set  $S$ , i.e., two points are adjacent in  $\langle S \rangle$  if and only if they are adjacent in  $G$ . If  $G_1$  is a subgraph of  $G_2$ , then  $G_2$  is a supergraph of  $G_1$ . A  $c$ -component graph comprises  $c$  disjoint, connected subgraphs.

In a complete graph  $K_n$  on  $n$  points, each point is joined to every other one, i.e., all pairs of points are adjacent. A clique in  $G$  is a complete subgraph of  $G$ . Examples of common cliques in molecular graphs are  $K_1$  (methane),  $K_2$  (ethane),  $K_3 \cong C_3$  (cyclopropane) and  $K_4$  (tetrahedrane). A complete bipartite graph or complete bigraph  $K_{m,n}$  contains  $m$  points of one color,  $n$  points of a second and all possible  $mn$  lines. A biclique in  $G$  is a complete bipartite subgraph of  $G$ . Examples of common bicliques in molecular graphs include  $K_{2,2} \cong C_4$  (cyclobutane) and the star graphs  $K_{1,2}$ ,  $K_{1,3}$  and  $K_{1,4}$ , which represent methylene, methine and quaternary carbon atoms, respectively.

A homologous series  $\{H\}$  is a recursively generated sequence of connected graphs  $G_1, G_2, G_3, \dots$ , where  $G_{i+1}$  is obtained by incrementing  $G_i$  according to a recurrent rule, which is a set of instructions that is repeated at each stage. Chemically relevant examples of homologous series are paths  $\{P_n\}$ , cycles  $\{C_n\}$ , star graphs  $\{K_{1,n-1}\}$  and complete graphs  $\{K_n\}$ .

Molecules are isomers whenever they have the same number and kinds of atoms (i.e., the same molecular formula) and the same number of bonds. By analogy, two point-colored graphs are isomers (or isomeric graphs) whenever they have the same number of points of each color and the same number of edges.

The line graph  $L(G)$  of a graph  $G$  has the lines of  $G$  as its points, and two points in  $L(G)$  are adjacent whenever the corresponding lines in  $G$  are adjacent. Thus, a pair of adjacent lines in  $G$ , called a connection, becomes a line in  $L(G)$ . When counting adjacent lines in pseudographs, a loop is not adjacent to itself and a double line has one adjacency. Repeating the process leads to the iterated line graphs  $L^i(G)$  ( $i = 0, 1, 2, \dots$ ), where  $L^0(G) \cong G$  and  $L^1(G) \cong L(G)$ . For completeness,  $L(C_1) \cong P_1$ ,  $L(P_1) \cong P_0 \cong G_0$  and  $L(G_0)$  is not defined. The iterated line graph sequence is the series of integers  $N^i$ , which are the numbers of lines in the iterated line graphs.

An edge cover  $\mathcal{C}$  of graph  $G$  is any family  $\mathcal{C} = \{S_1, \dots, S_n\}$  of subgraphs  $S_i(G)$  such that every edge of  $G$  is contained in  $E(S_i)$  for some  $i$ . In an edge clique cover every subgraph  $S_i \in \mathcal{C}$  is a clique in  $G$ ; in an edge biclique cover every  $S_i \in \mathcal{C}$  is a biclique in  $G$ . A minimal edge cover does not properly contain any other edge cover. Thus, in a minimal edge cover each  $S_i \in \mathcal{C}$  is essential, i.e.,  $S_i$  contains at least one edge of  $G$  that is not in any other subgraph  $S_j \in \mathcal{C}$  ( $i \neq j$ ). A partition  $P$  is an edge cover with the additional property that each edge belongs to exactly one  $S_i \in \mathcal{C}$ . Thus, in a partition no two subgraphs  $S_i$  and  $S_j$  ( $i \neq j$ ) have an edge in common.

**Table 13** Selected index values for all possible disconnections of azacyclohexane (**28**).<sup>a</sup>

| disconnection ( <b>28</b> ⇒) | $N_T(\text{lpe})$ | $-\Delta N_T(\text{lpe})$ | $N_S(\text{lpe})$ | $-\Delta N_S(\text{lpe})$ | $C(\eta, \varepsilon)$ | $-\Delta C(\eta, \varepsilon)$ |
|------------------------------|-------------------|---------------------------|-------------------|---------------------------|------------------------|--------------------------------|
| <b>28</b>                    | 59                | 0                         | 31                | 0                         | 30.92                  | 0.0                            |
| one-bond                     |                   |                           |                   |                           |                        |                                |
| <b>29</b>                    | 27                | 32                        | 17                | 14                        | 19.90                  | 11.0                           |
| <b>30</b>                    | 31                | 28                        | 22                | 9                         | 19.90                  | 11.0                           |
| <b>31</b>                    | 33                | 26                        | 21                | 10                        | 19.90                  | 11.0                           |
| two-bond                     |                   |                           |                   |                           |                        |                                |
| <b>32</b>                    | 17                | 42                        | 7                 | 24                        | 7.51                   | 23.4                           |
| <b>33</b>                    | 21                | 38                        | 14                | 17                        | 13.12                  | 17.8                           |
| <b>34</b>                    | 24                | 35                        | 17                | 14                        | 13.12                  | 17.8                           |
| <b>35</b>                    | 25                | 34                        | 14                | 17                        | 11.12                  | 19.8                           |
| <b>36</b>                    | 15                | 44                        | 8                 | 23                        | 4.00                   | 26.9                           |
| <b>37</b>                    | 17                | 42                        | 11                | 20                        | 7.24                   | 23.7                           |
| <b>38</b>                    | 19                | 40                        | 12                | 19                        | 7.24                   | 23.7                           |
| <b>39</b>                    | 15                | 44                        | 9                 | 22                        | 2.75                   | 28.2                           |
| <b>40</b>                    | 16                | 43                        | 9                 | 22                        | 2.75                   | 28.2                           |
| three-bond                   |                   |                           |                   |                           |                        |                                |
| <b>41</b>                    | 13                | 46                        | 6                 | 25                        | 2.00                   | 28.9                           |
| <b>42</b>                    | 16                | 43                        | 11                | 20                        | 7.24                   | 23.7                           |
| <b>43</b>                    | 18                | 41                        | 12                | 19                        | 7.24                   | 23.7                           |
| <b>44</b>                    | 11                | 48                        | 5                 | 26                        | 0.00                   | 30.9                           |
| <b>45, 46<sup>b</sup></b>    | 12                | 47                        | 7                 | 24                        | 2.00                   | 28.9                           |
| <b>47, 48<sup>b</sup></b>    | 13                | 46                        | 8                 | 23                        | 2.75                   | 28.2                           |
| <b>49</b>                    | 14                | 45                        | 8                 | 23                        | 2.75                   | 28.2                           |
| <b>50</b>                    | 11                | 48                        | 6                 | 25                        | 2.00                   | 28.9                           |
| four-bond                    |                   |                           |                   |                           |                        |                                |
| <b>51</b>                    | 9                 | 50                        | 4                 | 27                        | 0.00                   | 30.9                           |
| <b>52</b>                    | 10                | 49                        | 6                 | 25                        | 2.00                   | 28.9                           |
| <b>53</b>                    | 9                 | 50                        | 4                 | 27                        | 0.00                   | 30.9                           |
| <b>54, 55<sup>b</sup></b>    | 10                | 49                        | 6                 | 25                        | 2.00                   | 28.9                           |
| five-bond                    |                   |                           |                   |                           |                        |                                |
| <b>56, 57<sup>b</sup></b>    | 8                 | 51                        | 4                 | 27                        | 0.00                   | 30.9                           |
| <b>58</b>                    | 9                 | 50                        | 5                 | 26                        | 2.00                   | 28.9                           |
| six-bond                     |                   |                           |                   |                           |                        |                                |
| <b>59</b>                    | 7                 | 52                        | 3                 | 28                        | 0.00                   | 30.9                           |

<sup>a</sup> For structures see Figure I, next page. <sup>b</sup> Pairs of isomorphic disconnections.

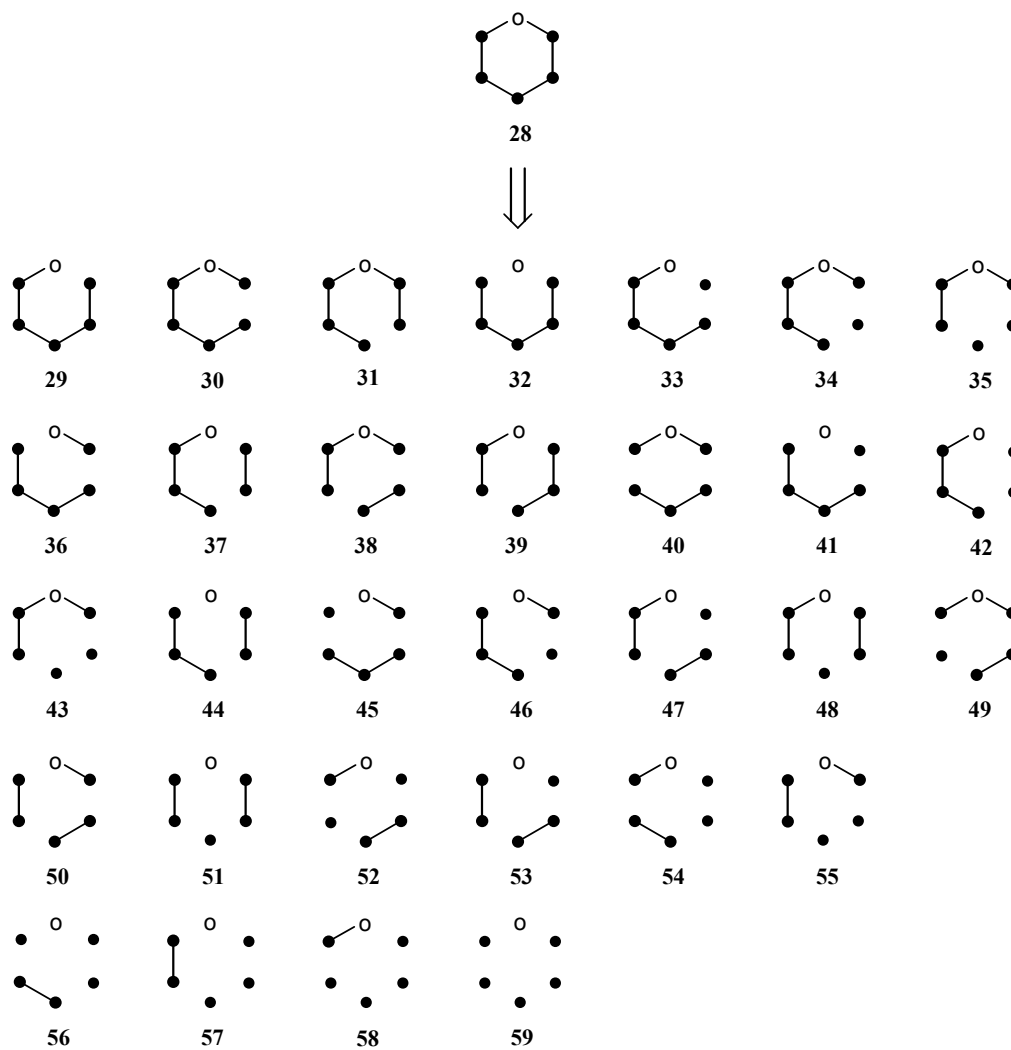

Figure I All possible disconnections of azacyclohexane (28).
